# Supplementary material for: Sulfuryl chloride as a functional additive towards dendrite-free and long-life Li metal anodes
Source: Royal Society of Chemistry journal article supplement (doi:10.1039/c9ta09068a), 2019-01-01
Supplement: c9ta09068a1.pdf [file c9ta09068a1.pdf]

## **Sulfuryl Chloride as a Functional Additive towards Dendrite-Free and Long-Life Li Metal Anodes**

Xiangxiang Fu<sup>a,1</sup>, Gang Wang<sup>b,1</sup>, Dai Dang<sup>a,\*</sup>, Quanbing Liu<sup>a</sup>, Xunhui Xiong<sup>b,\*</sup>,  
Chuande Wu<sup>a,c,\*</sup>

<sup>a</sup> School of Chemical Engineering and Light Industry, Guangdong University of Technology, Guangzhou, Guangdong, 510006, P. R. China

<sup>b</sup> Guangzhou Key Laboratory of Surface Chemistry of Energy Materials, New Energy Research Institute, School of Environment and Energy, South China University of Technology, Guangzhou 510006, P. R. China

<sup>c</sup> State Key Laboratory of Silicon Materials, Department of Chemistry, Zhejiang University, Hangzhou 310027, P. R. China

<sup>1</sup> These authors contributed equally to this work.

## Experimental

**Materials:** The metallic Li foil ( $\Phi$ 15 mm) was obtained from China Energy Lithium Co., Ltd. The electrolyte composed of LiPF<sub>6</sub> (1.0 M) and EC/DMC (1:1 by volume) was purchased from DodoChem. Sulfonyl chloride (SO<sub>2</sub>Cl<sub>2</sub>) with purity of 99.5% was purchased from Macklin Co. Ltd.

**Material characterization:** The morphology and elemental distribution were observed by Field-emission scanning electron microscope (FE-SEM, Hitachi SU8010) with an energy dispersive X-ray spectroscopy (EDS, JEOL JSM-6100LV). All the batteries after cycled were disassembled and flushed with anhydrous dimethyl carbonate (DMC) solvent three times to remove remnant lithium salts, and then dried until the solvent volatilized thoroughly in glovebox before operating. The elemental valence of the SEI layer was detected by X-ray photoelectron spectroscopy (XPS, ESCALab220i-XL) with 300 W Al K $\alpha$  radiations under ambient temperature.

**Electrochemical measurements:** Two-electrode cells configuration using standard 2032 coin-type cells were employed and assembled in an Ar-filled glove box with H<sub>2</sub>O and O<sub>2</sub> concentrations below 0.1 ppm. The electrolytes were prepared by dissolving 0.5%, 1%, 2%, 5% SO<sub>2</sub>Cl<sub>2</sub> additives (by quality) into 1.0 M LiPF<sub>6</sub> in EC/DMC. For the symmetric cell tests, two identical electrodes were carried out at various current densities under different electrolytes with the deposition capacity of 1 mAh cm<sup>-2</sup> or 4 mAh cm<sup>-2</sup> to investigate the lithium stripping/plating processes. The electrodes used in contrast experimental were pretreated the Li with SO<sub>2</sub>Cl<sub>2</sub> for 5 minutes and tested at 1 mA cm<sup>-2</sup> under a fixed capacity of 1 mAh cm<sup>-2</sup>. For the CE testing, 0.5 mAh cm<sup>-2</sup> of Li

without or with 2%  $\text{SO}_2\text{Cl}_2$  additive was deposited on Cu foil ( $\Phi 12$  mm) and then stripped away up to 1.0 V at a current density of  $0.5 \text{ mA cm}^{-2}$  for every cycle.  $\text{Li}|\text{LiFePO}_4$  full cells tests used  $\text{LiFePO}_4$  as the cathode at 1 C in a voltage range of 2.5-4.2V, the mass loading of the  $\text{LiFePO}_4$  cathode material is about  $5 \text{ mg cm}^{-2}$ . EIS tests were carried out on an electrochemical workstation (CHI660a, Shanghai Chenhua) in the frequency ranging from  $10^5$  to  $10^{-2}$  Hz.

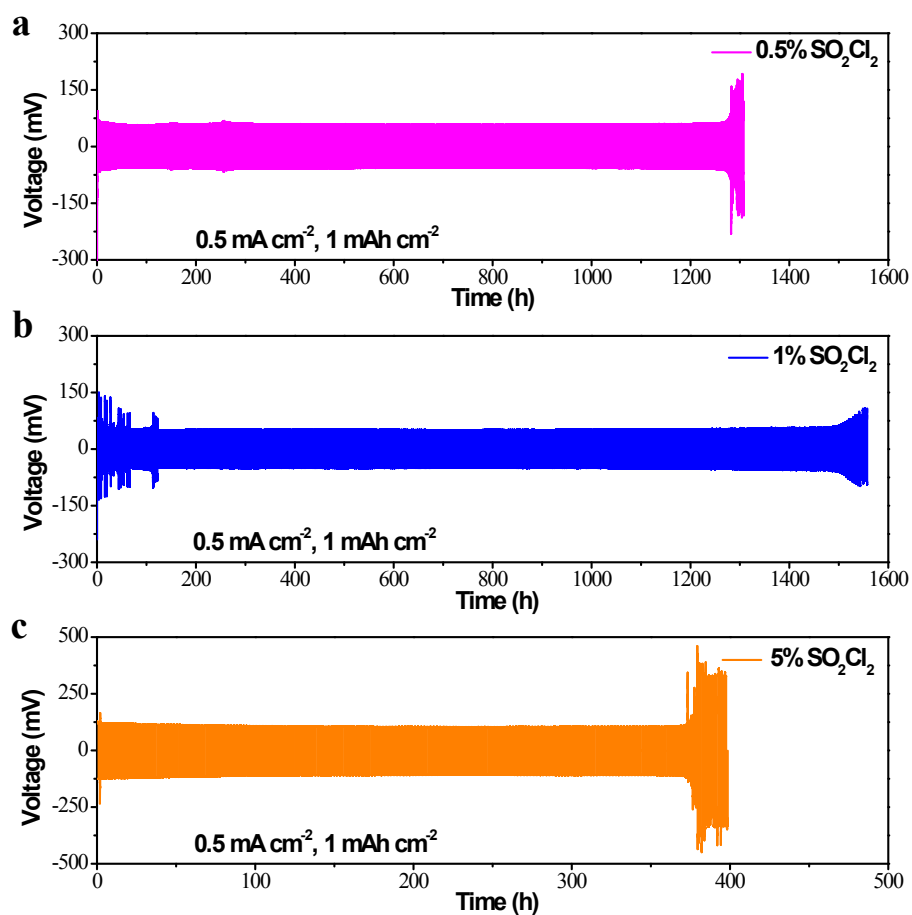

**Fig. S1** Cycling stability of symmetrical cells using various ratios of electrolyte additives at 0.5 mA cm<sup>-2</sup> under a fixed capacity of 1 mAh cm<sup>-2</sup>.

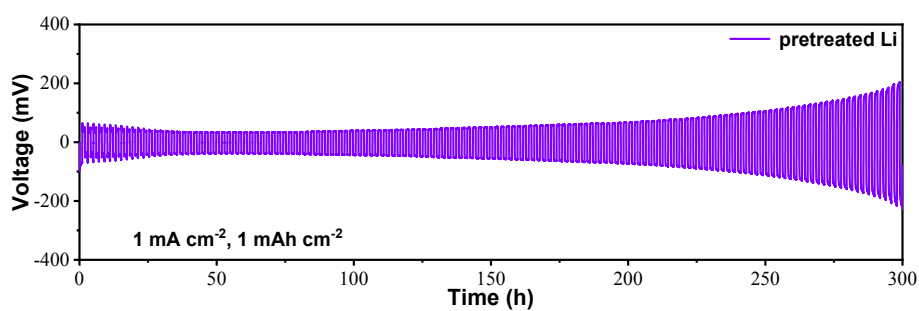

**Fig. S2** Cycling stability of symmetrical cells using pretreat the Li with SO<sub>2</sub>Cl<sub>2</sub> at 1 mA cm<sup>-2</sup> under a fixed capacity of 1 mAh cm<sup>-2</sup>.

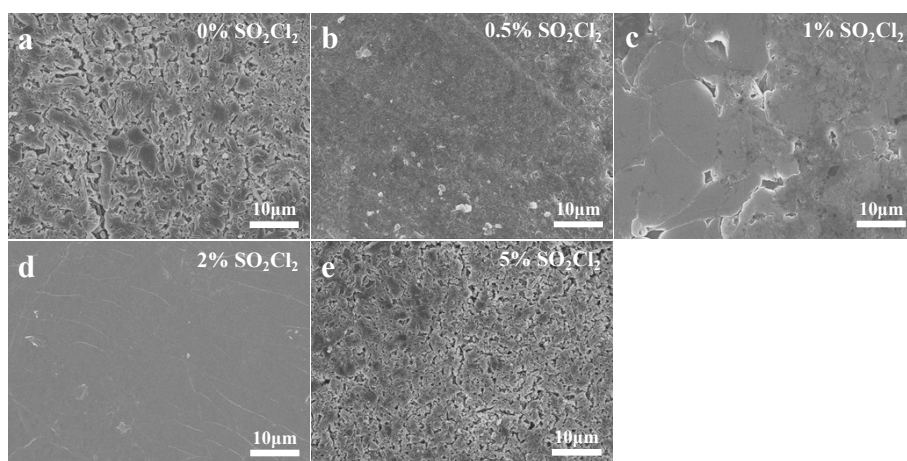

**Fig. S3** SEM images of symmetrical cells after 100 cycles using various ratios of electrolyte additives at  $0.5 \text{ mA cm}^{-2}$  under a fixed capacity of  $1 \text{ mAh cm}^{-2}$ .

**Table. S1** Cyclic stability comparison with previously reported works on Li metal anodes.

| Current density<br>( $\text{mA cm}^{-2}$ ) | Deposition capacity<br>( $\text{mAh cm}^{-2}$ ) | Overpotential<br>(mV) | Cycle time<br>(h) | Electrolyte                        | References |
|--------------------------------------------|-------------------------------------------------|-----------------------|-------------------|------------------------------------|------------|
| 0.1                                        | 0.2                                             | ~60                   | 800               | 1M LiTFSI/(DOL+DME)                | Ref.1      |
| 1                                          | 0.5                                             | ~100                  | 900               | 1M LiPF <sub>6</sub> /(EC+DMC+DEC) | Ref.2      |
| 1                                          | 1                                               | 43.4                  | 520               | 1M LiTFSI/(DOL+DME)                | Ref.3      |
| 0.5                                        | 1                                               | 55                    | 650               | 1M LiTFSI/(DOL+DME)                | Ref.4      |
| 0.5                                        | 0.5                                             | 52                    | 300               | 1M LiTFSI/TEP                      | Ref.5      |
| 1                                          | 1                                               | 60                    | 400               | 1M LiTFSI/(DOL+DME)                | Ref.6      |
| 1                                          | 1                                               | 52                    | 700               | 1M LiPF <sub>6</sub> /(EC+DMC+DEC) | Ref.7      |
| 1                                          | 1                                               | ~100                  | 250               | 1M LiPF <sub>6</sub> /(EC+DMC+DEC) | Ref.8      |
| 0.5                                        | 1                                               | 32                    | 2000              | 1M LiPF <sub>6</sub> /(EC+DMC)     | This work  |
| 1                                          | 1                                               | ~40                   | 1200              |                                    |            |

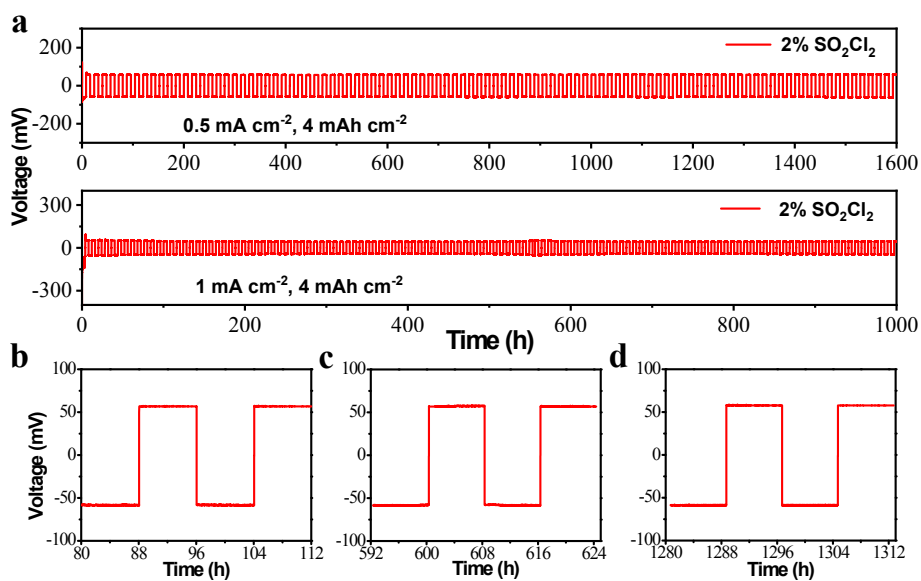

**Fig. S4** Cycling stability of symmetrical cells using 2% SO<sub>2</sub>Cl<sub>2</sub> as the electrolyte additive at 0.5 mA cm<sup>-2</sup> and 1 mA cm<sup>-2</sup> under a fixed capacity of 4 mAh cm<sup>-2</sup>.

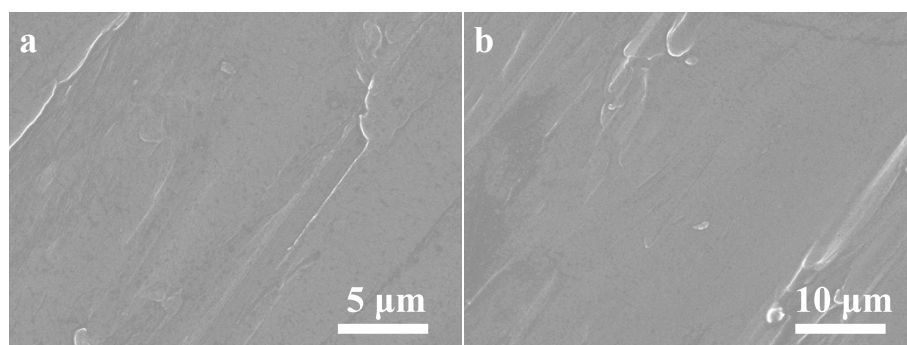

**Fig. S5** SEM images of Li metal anode before cycling.

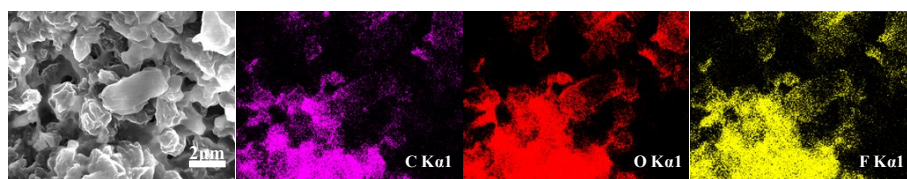

**Fig. S6** EDS elemental distribution maps of bare Li metal.

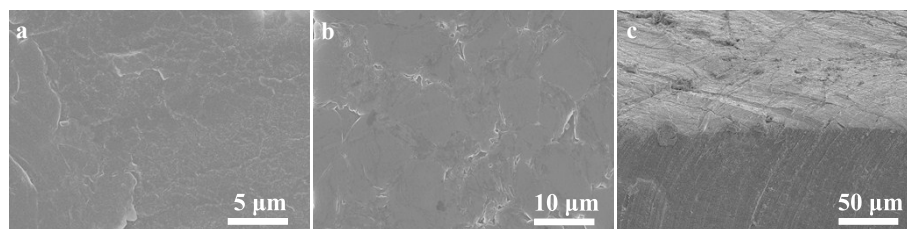

**Fig. S7** SEM images of Li surface with SO<sub>2</sub>Cl<sub>2</sub> additive after 200 cycles.

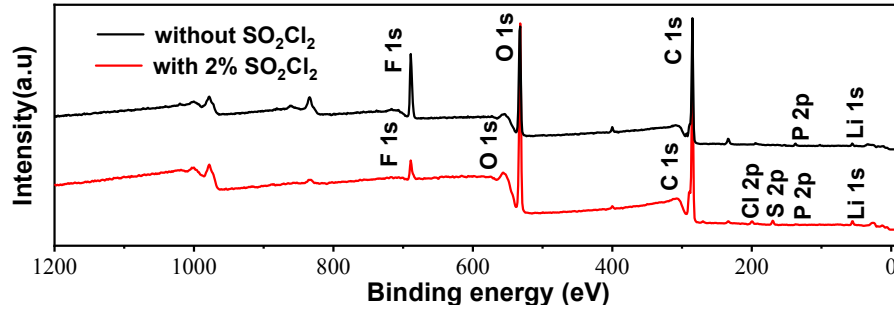

**Fig. S8** XPS survey scans of Li metals surface state after 10 cycles at the current density of  $0.5 \text{ mA cm}^{-2}$  in symmetrical cell.

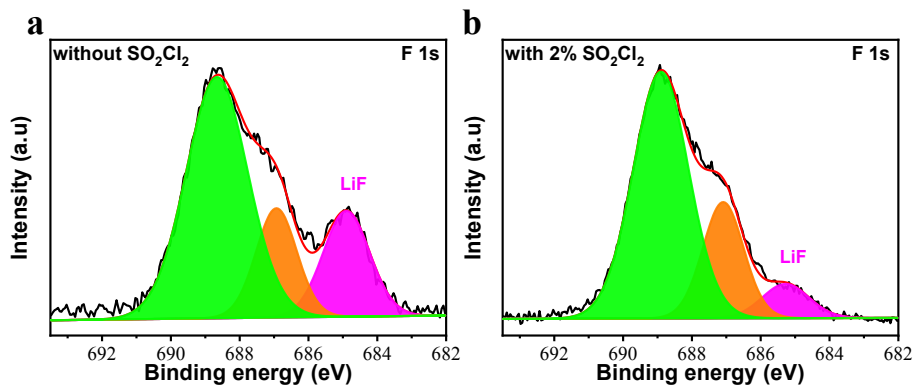

**Fig. S9** The high-resolution XPS spectra of (a) F 1s for bare Li anode and (b) F 1s for 2%  $\text{SO}_2\text{Cl}_2$  additive at the current density of  $0.5 \text{ mA cm}^{-2}$  after 10 cycles in symmetrical cells.

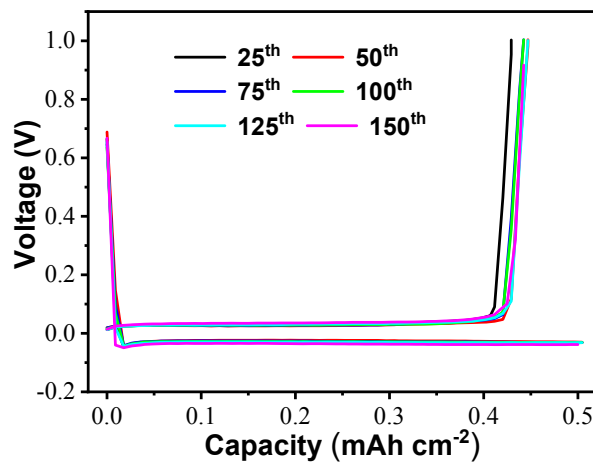

**Fig. S10** Charge/discharge curves of Li||Cu cell with 2%  $\text{SO}_2\text{Cl}_2$  at particular cycles.

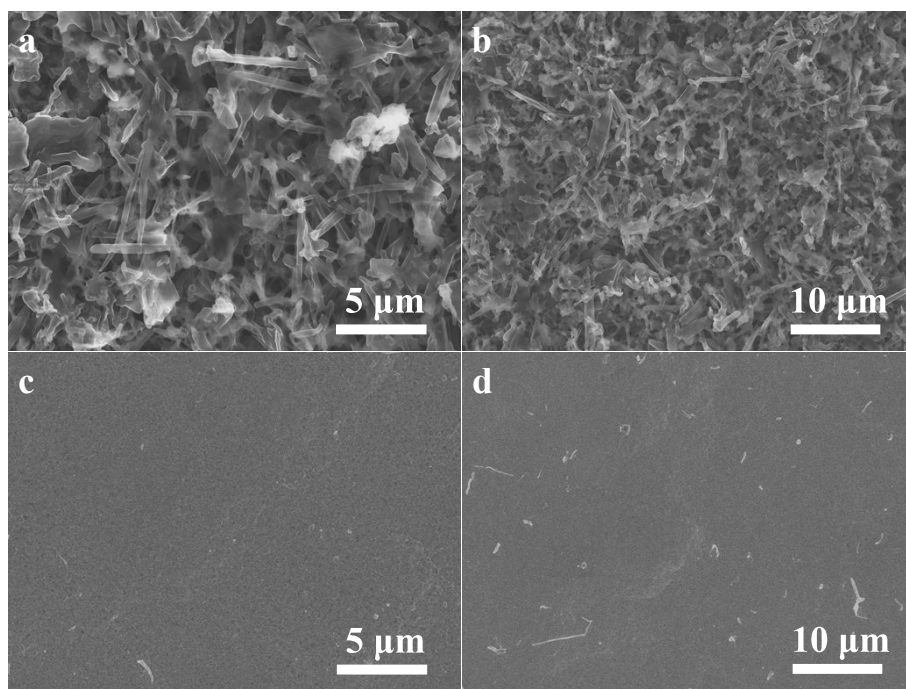

**Fig. S11** SEM images of Cu surface (a, b) without  $\text{SO}_2\text{Cl}_2$  and with 2%  $\text{SO}_2\text{Cl}_2$  additive (c, d) after 50 cycles.



## Reference

1. Y. He, H. W. Xu, J. L. Shi, P. Y. Liu, Z. Q. Tian, N. Dong, K. Luo, X. F. Zhou and Z. P. Liu, *Energy Storage Materials*, 2019, DOI: 10.1016/j.ensm.2019.04.026.
2. D. Zhang, S. Wang, B. Li, Y. J. Gong and S. B. Yang, *Adv. Mater*, 2019, 1901820.
3. Y. X. Yuan, W. Feng, B. Ying, L. Yu, G. H. Chen, Z. H. Wang and C. Wu, *Energy Storage Materials*, 2019, **16**, 411-418.
4. W. W. Wang, X. Y. Yue, J. K. Meng, J. Y. Wang, X. X. Wang, H. Chen, D. R. Shi, J. Fu, Y. N. Zhou, J. Chen and Z. W. Fu, *Energy Storage Materials*, 2019, **18**, 414-422.
5. S. J. Tan, J. P. Yue, X. C. Hu, Z. Z. Shen, W. P. Wang, J. Y. Li, T. T. Zhou, H. Duan, Y. Xiao, Y. X. Yin, R. Wen and Y. G. Guo, *Angew. Chem. Int. Ed*, 2019, **58**, 7802-7807.
6. R. Zhang, X. Chen, X. Shen, X. Q. Zhang, X. R. Chen, X. B. Cheng, C. Yan, C. Z. Zhao and Q. Zhang, *Joule*, 2018, **2**, 764-777.
7. M. Q. Zhu, B. Li, S. M. Li, Z. G. Du, Y. J. Gong and S. B. Yang, *Adv. Energy Mater*, 2018, **8**, 1703505.
8. N. W. Li, Y. Shi, Y. X. Yin, X. X. Zeng, J. Y. Li, C. J. Li, L. J. Wan, R. Wen and Y. G. Guo, *Angew. Chem. Int. Ed*, 2018, **57**, 1505-1509.
